# Supplementary material for: Toxoplasma gondii in a Remote Subsistence Hunting-Based Indigenous Community of the Peruvian Amazon
Source: MDPI journal article supplement (doi:10.3390/tropicalmed9050098), 2024-04-26
Supplement: s1 [file s1]

**Table S1.** Semi-structured survey conducted with 84 heads of families, documenting hunting activities and human-animal interactions, in Nueva Esperanza community in the Peruvian Amazon.

| RISK FACTORS (SOCIOLOGICAL DATA) |                                                                 |                               |
|----------------------------------|-----------------------------------------------------------------|-------------------------------|
| 1                                | Are you a hunter?                                               | ( ) Yes ( ) No                |
| 2                                | How many days a week do you hunt?                               | Number: ____                  |
| 3                                | Do you use any hunting equipment?<br>(including dogs)           | ( ) Yes ( ) No<br>Which: ____ |
| 4                                | Do you use any safety measures when<br>handling hunted animals? | ( ) Yes ( ) No<br>Which: ____ |
| 5                                | Have you noticed any injuries when<br>handling the animals?     | ( ) Yes ( ) No                |
| 6                                | Do you wash your hands after handling the<br>hunted animals?    | ( ) Yes ( ) No                |
| 7                                | Do you check if the hunted animals have any<br>injuries?        | ( ) Yes ( ) No                |
| 8                                | Where do you remove the viscera of the<br>hunted animals?       | Place: ____                   |
| 9                                | Where do you dispose of the viscera of the<br>hunted animals?   | Place: ____                   |
| 10                               | Do you raise animals at home?                                   | ( ) Yes ( ) No                |
|                                  | Cats                                                            | ( ) Yes ( ) No                |
|                                  | Dogs                                                            | ( ) Yes ( ) No                |
|                                  | Chickens/ Ducks                                                 | ( ) Yes ( ) No                |
|                                  | Pigs                                                            | ( ) Yes ( ) No                |
|                                  | Do you deworm domestic animals?                                 | ( ) Yes ( ) No                |
|                                  | Do you deworm vaccine animals?                                  | ( ) Yes ( ) No                |
|                                  | Do you have wild animals at home?                               | ( ) Yes ( ) No<br>Which: ____ |
| 11                               | Have any animals died at home recently?                         | ( ) Yes ( ) No                |
| 12                               | Do dogs eat waste organs or meat?                               | ( ) Yes ( ) No                |
| 13                               | Do chickens eat waste organs or meat?                           | ( ) Yes ( ) No                |
| 14                               | Are there any sick animals at home?                             | ( ) Yes ( ) No                |
| 15                               | Presence of mice at home                                        | Place: ____                   |
| 16                               | Have you been bitten by mice at home?                           | ( ) Yes ( ) No                |

|    |                                                  |                              |                             |
|----|--------------------------------------------------|------------------------------|-----------------------------|
| 17 | Have you seen mouse nests or droppings at home?  | <input type="checkbox"/> Yes | <input type="checkbox"/> No |
| 18 | Have you seen food with mouse droppings at home? | <input type="checkbox"/> Yes | <input type="checkbox"/> No |
| 19 | Presence of bats at home                         | <input type="checkbox"/> Yes | <input type="checkbox"/> No |
| 20 | Have you been bitten by bats at home?            | <input type="checkbox"/> Yes | <input type="checkbox"/> No |
| 21 | Do bats sleep at home?                           | <input type="checkbox"/> Yes | <input type="checkbox"/> No |
| 22 | Have you seen bat droppings at home?             | <input type="checkbox"/> Yes | <input type="checkbox"/> No |

**Table S2.** Semi-structured survey conducted with 60 adult residents, exploring practices related to handling, processing, preservation and consumption of wild meat, in Nueva Esperanza community in the Peruvian Amazon.

| FEEDING BEHAVIOR |                                                               |                                                                                                                          |
|------------------|---------------------------------------------------------------|--------------------------------------------------------------------------------------------------------------------------|
| 1                | How many days a week do you eat wild game meat?               | Number: _____                                                                                                            |
| 2                | How do you preserve meat that is not consumed?                | Fresh ( )    Smoked ( )    Dried/Salted ( )                                                                              |
| 3                | Where do you prepare the meat that is consumed daily?         | Home ( )    Outdoors ( )                                                                                                 |
| 4                | How is the meat prepared in your home?                        | ( ) Cooked at low temperature<br>( ) Rarely cooked<br>( ) Dehydrated with salt (jerky)<br>( ) Cooked at high temperature |
| 5                | Do you consume meat with injuries?                            | ( ) Yes    ( ) No                                                                                                        |
| 6                | Do you consume animal viscera ? Which ones?                   | ( ) Liver    ( ) Lung<br>( ) Kidney    ( ) Heart<br>( ) Fetus    ( ) Others _____                                        |
| 7                | Do you usually eat the viscera of animals that have injuries? | ( ) Yes, whole( ) No<br>( ) I remove the injuries and consume the healthy part                                           |
| 8                | Do you consume animals that are already dead?                 | ( ) Yes    ( ) No                                                                                                        |
| 9                | What water do you use for cooking?                            | ( ) Rainwater( ) Stream water<br>( ) River water( ) Treated water<br>( ) Other                                           |
| 10               | Where do you dispose of wastewater?                           | Location: _____                                                                                                          |

**Table S3.** Estimation of *Toxoplasma gondii* infection in wild mammals hunted and recorded in the indigenous community Nueva Esperanza community (Peruvian Amazon) between 2010 and 2020, considering serology found in the present study.

| <i>Species</i>                       | <i>T. gondii</i><br>seropositivity<br>(%) | Number of individuals<br>hunted and registered | Estimated number of<br>infected and<br>consumed individuals |
|--------------------------------------|-------------------------------------------|------------------------------------------------|-------------------------------------------------------------|
| <i>Cuniculus paca</i>                | 57/139 (41.0%)                            | 952                                            | 390.3                                                       |
| <i>Pecari tajacu</i>                 | 18/65 (27.7%)                             | 316                                            | 87.5                                                        |
| <i>Tayassu pecari</i>                | 16/54 (29.6%)                             | 207                                            | 61.3                                                        |
| <i>Lagothrix I.<br/>poeppiggi</i>    | 15/66 (22.7%)                             | 268                                            | 60.8                                                        |
| <i>Mazama<br/>americana</i>          | 13/51 (25.5%)                             | 227                                            | 57.9                                                        |
| <i>Dasypus<br/>novemcinctus</i>      | 17/38 (44.7%)                             | 83                                             | 37.1                                                        |
| <i>Sapajus<br/>macrocephalus</i>     | 15/32 (46.9%)                             | 66                                             | 30.95                                                       |
| <i>Ateles chamek</i>                 | 3/20 (15.0%)                              | 98                                             | 14.7                                                        |
| <i>Tapirus terrestris</i>            | 4/21 (19.1%)                              | 74                                             | 14.1                                                        |
| <i>Cebus albifrons</i>               | 3/7 (42.9%)                               | 24                                             | 10.3                                                        |
| <i>Nasua nasua</i>                   | 2/19 (10.5%)                              | 86                                             | 9.0                                                         |
| <i>Dasyprocta<br/>fuliginosa</i>     | 1/6 (16.7%)                               | 34                                             | 5.7                                                         |
| <i>Mazama<br/>nemorivaga</i>         | 1/1 (100%)                                | 5                                              | 5.0                                                         |
| <i>Plecturocebus<br/>cupreus</i>     | 1/4 (25.0%)                               | 11                                             | 2.75                                                        |
| <i>Alouatta seniculus</i>            | 1/3 (33.3%)                               | 7                                              | 2.3                                                         |
| <i>Cacajao clavus</i>                | 1/16 (6.25%)                              | 33                                             | 2.1                                                         |
| <i>Hydrochoerus<br/>hydrochaeris</i> | 1/1 (100%)                                | 1                                              | 1.0                                                         |
| <i>Sciurus cf.<br/>igniventris</i>   | 0/1 (0.0%)                                | 2                                              | 0.0                                                         |
| <i>Galea musteloides</i>             | 0/1 (0.0%)                                | 2                                              | 0.0                                                         |

|                                                                |            |      |       |
|----------------------------------------------------------------|------------|------|-------|
| <i>Leontocebus</i><br>( <i>Saguinus</i> )<br><i>fuscicolis</i> | 0/1 (0.0%) | 28   | 0.0   |
| <i>Pithecia monachus</i>                                       | 0/6 (0.0%) | 18   | 0.0   |
| <b>Total</b>                                                   |            | 2556 | 792.8 |

---
